# Supplementary material for: A Concept for a Consolidated Humus Form Description—An Updated Version of German Humus Form Systematics
Source: MDPI journal article supplement (doi:10.3390/ijpb14030050), 2023-07-28
Supplement: s1 [file s1]

Archive with 1 entries (1 files):
- ijpb-2455218-supplementary.pdf
